# Supplementary figures and images for: The Role of PnTCP2 in the Lobed Leaf Formation of Phoebe neurantha var. lobophylla
Source: MDPI journal article supplement (doi:10.3390/ijms232113296), 2022-10-31

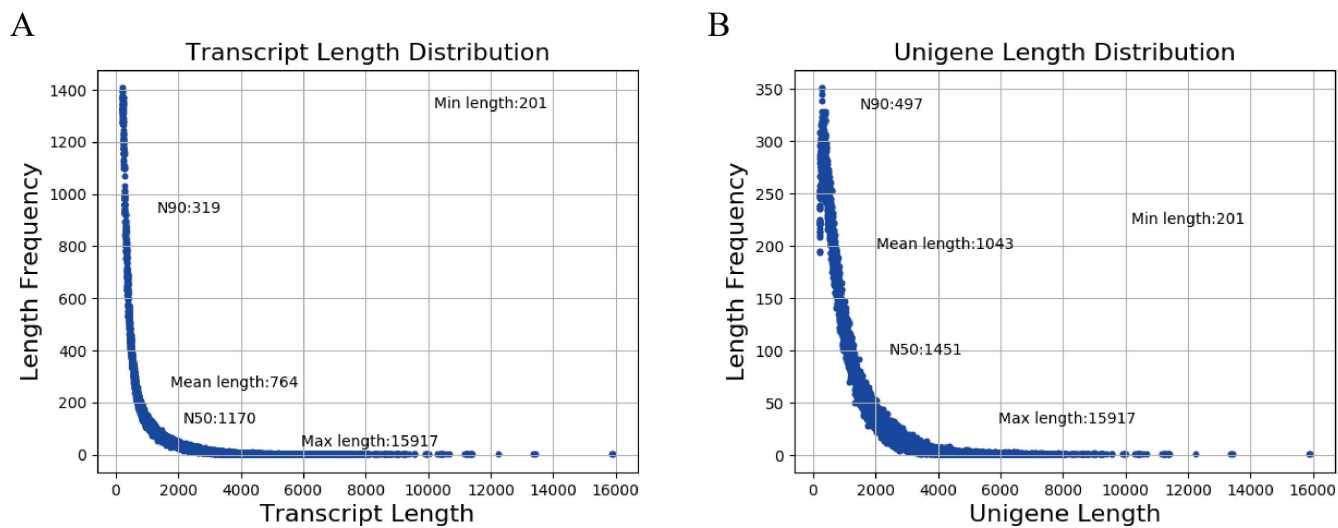

Supplement: s1 [file s1]
